# Supplementary material for: Patching defects in the active layer of large-area organic solar cells
Source: Royal Society of Chemistry journal article supplement (doi:10.1039/c7ta11264e), 2018-01-01

## Supporting information

### Patching defects of the active layer for large-area organic solar cells

Lin Mao<sup>a</sup>, Lulu Sun<sup>a</sup>, Bangwu Luo<sup>a</sup>, Youyu Jiang<sup>a</sup>, and Yinhua Zhou<sup>a,b,\*</sup>

*<sup>a</sup>Wuhan National Laboratory for Optoelectronics, School of Optical and Electronic Information, Huazhong University of Science and Technology, Wuhan 430074, China*

*<sup>b</sup>Research Institute of Huazhong University of Science and Technology in Shenzhen, Shenzhen 518057, China*

\*Corresponding author. Email: [yh\\_zhou@hust.edu.cn](mailto:yh_zhou@hust.edu.cn)

**Figure S1.** Contact angle: a) PEI solution in isopropanol (100 mg/ml) on top of P3HT:ICBA film; b) PVA in water (50 mg/ml) with PEG-TmDD (to 40 mg/ml) added; c) PMMA in acetone (0.5 g/ml) on top of PBDB-T:ITIC films.

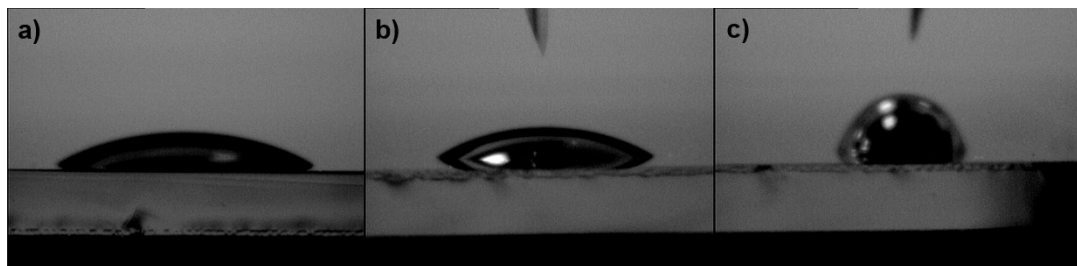

**Figure S2.**  $J$ - $V$  characteristics in the dark of three types of organic solar cells with structure of Glass/ITO/PEI/P3HT:ICBA/MoO<sub>3</sub>/Ag and the area of 50 mm<sup>2</sup>: one comprises a 5 mm<sup>2</sup> artificial defect, the other one comprises a defect with the same area but patched up by writing PEI, and the third one is the reference cell without defects.

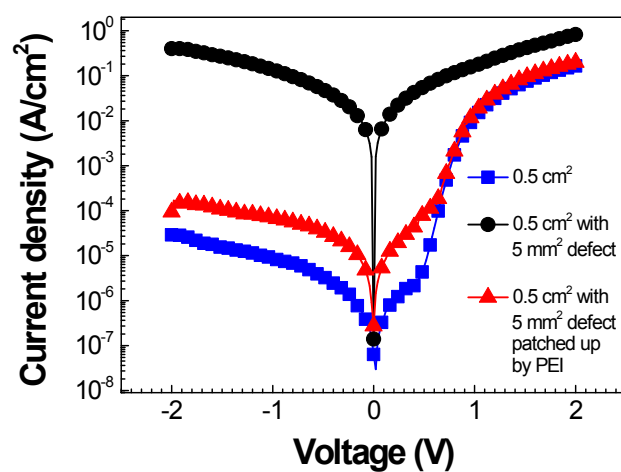

**Figure S3.** a) Picture of a s active layer film (P3HT:ICBA) with three “comet tail” shaped defects in the active area (1.6 cm<sup>2</sup>). b)  $J$ - $V$  characteristics under illumination and in the dark of the completed device patched up by PEI.

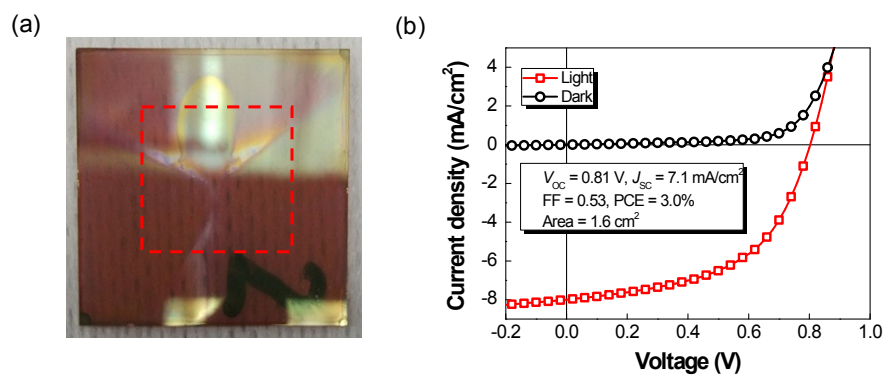

**Figure S4.**  $J$ - $V$  characteristics of OSCs with device area of 50 mm<sup>2</sup> and the device structure of Glass/ITO/ZnO/PBDB-T:ITIC/MoO<sub>3</sub>/Ag.

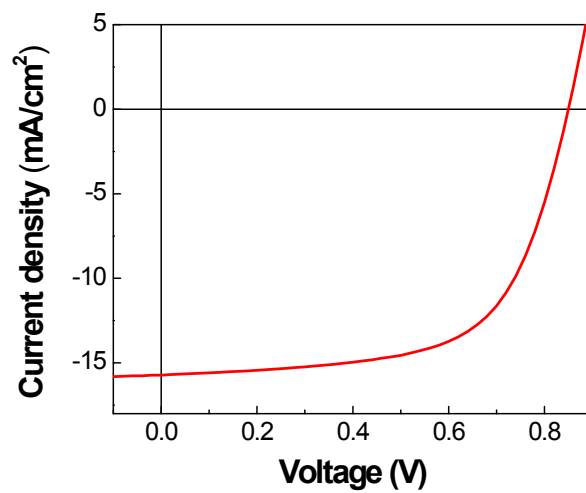

**Figure S5.**  $J$ - $V$  characteristics in the dark of four types of OSCs with structure of Glass/ITO/ZnO/PBDB-T:ITIC/MoO<sub>3</sub>/Ag. One comprising a 5 mm<sup>2</sup> artificial defect, the other two comprising a defect with the same area but patched by writing PEI or PVA, and the fourth one as the reference without defects. The device area of 50 mm<sup>2</sup>.

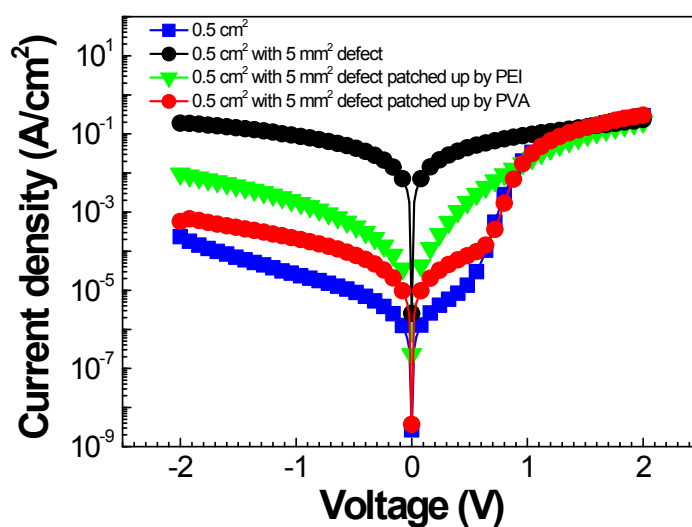

**Figure S6.** Patching trace of PVA on deliberately created defects (WNLO shape) on the PBDB-T:ITIC films (the left is patched, and the right is not patched).

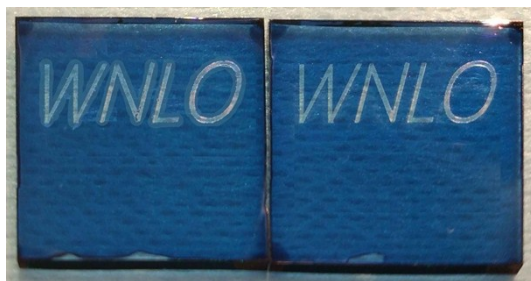

**Figure S7.** a) Pictures and  $J$ - $V$  characteristics b) under illumination and in dark of 21 cm<sup>2</sup>, 5-subcells solar module.

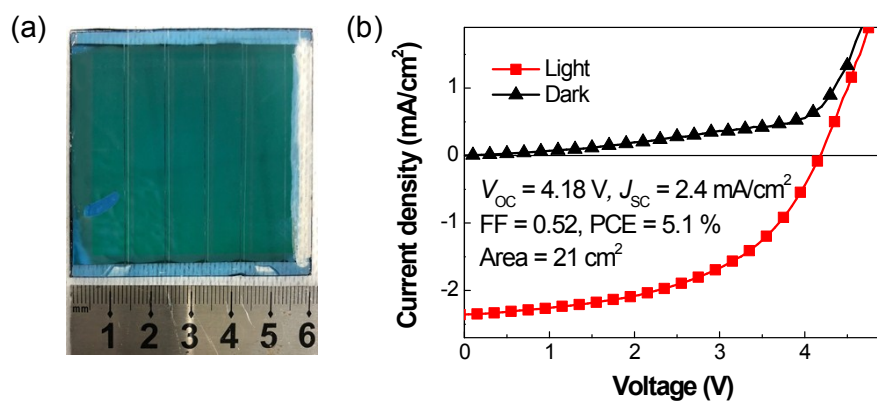

Supplement: c7ta11264e1.pdf [file c7ta11264e1.pdf]
